# Supplementary material
Source: PubMed Central journal article supplement (PMC10579452)
Supplement: NIHMS1877796-supplement-1.pdf [file NIHMS1877796-supplement-1.pdf]

|                                                  |                        |                                                                                                                                                                                          |                                                                                                               |                                                                                         |                                                                                                                                                                              |                                                                                                                                                                                                                                                                                                   |                                                                                                                                               |
|--------------------------------------------------|------------------------|------------------------------------------------------------------------------------------------------------------------------------------------------------------------------------------|---------------------------------------------------------------------------------------------------------------|-----------------------------------------------------------------------------------------|------------------------------------------------------------------------------------------------------------------------------------------------------------------------------|---------------------------------------------------------------------------------------------------------------------------------------------------------------------------------------------------------------------------------------------------------------------------------------------------|-----------------------------------------------------------------------------------------------------------------------------------------------|
|                                                  |                        | getting eye/ear check.                                                                                                                                                                   |                                                                                                               |                                                                                         |                                                                                                                                                                              |                                                                                                                                                                                                                                                                                                   |                                                                                                                                               |
|                                                  | Ricky, 5 yrs 8 mos     | <p><b>~9-10 mos:</b> Mom notices does not turn head at a siren. He is late with language and oral milestones</p> <p><b>~12 mos:</b> Parents ponder whether something might be wrong.</p> | <p>At <b>18 mos</b> well-child visit: Dad raises concerns about Ricky’s development.</p>                      | Pediatrician tells parents to contact the RC.                                           |                                                                                                                                                                              | <p><b>22 mos:</b> assessed by the RC (qualifies for services, dx: unknown).</p> <p><b>2 yrs 8 mos:</b> Family moves, assessed by new RC; dx ASD.</p> <p><b>2 yrs 11 mos:</b> assessed by the school district (qualifies: “autism” category).</p>                                                  | <p><b>Conventional:</b> Behavior therapy<br/>Speech therapy<br/>Occupational therapy<br/>1:1 aide (school)<br/>Adapted physical education</p> |
| Pediatrician initiated →<br>Pediatrician delayed | Tanok, 5 yrs 1 mo      | <p><b>~2 yrs:</b> isn’t combining words, but as a first-time parent, Mom doesn’t know that he should be and is not concerned.</p>                                                        | <p>At <b>18 mos</b> well-child visit: Pediatrician asks about speech. Tanok has 15-20 words.</p>              | Pediatrician says, “He’s learning two languages and he’s a boy, he’s okay, it’ll come.” | <p>At <b>2 yr</b> well-child visit: Pediatrician asks if Tanok is combining 2 words (he was not). Pediatrician refers them to speech therapy, who refers them to the RC.</p> | <p><b>~2 yrs 1 mo:</b> assessed by MCO (does not qualify)</p> <p><b>~2 yrs 1 mo:</b> assessed by RC; dx: speech delay.</p> <p><b>~2 yrs 11 mos:</b> assessed by the school district (qualifies: “autism” category).</p> <p><b>3 yrs:</b> assessed by the RC; dx ASD, assessed by MCO; dx ASD.</p> | <p><b>Conventional:</b> Behavior therapy<br/>Speech therapy<br/>Occupational therapy</p>                                                      |
|                                                  | Mateo Jr, 4 yrs 11 mos | <p><b>10-12 mos:</b> Mom notices Mateo Jr has lost all 3 words he had previously</p>                                                                                                     | <p>At <b>12 mos</b> well-child visit: Pediatrician asks if Mateo Jr is talking. Mom says stopped talking.</p> | Pediatrician says, “We’ll wait 6 months, then we might have him assessed.”              | 1 month later, Mom contacts the RC.                                                                                                                                          | <p><b>~13 mos:</b> assessed by the RC ; dx: DD.</p> <p><b>4 yrs 1 mo:</b> assessed by the RC; dx ASD.</p> <p><b>4 yrs 2 mos:</b> assessed by the school district (qualifies: “autism” category).</p>                                                                                              | <p><b>Conventional:</b> Speech therapy<br/>Occupational therapy<br/>Respite care</p> <p><b>CHA:</b> Supplements</p>                           |

|                                         |                       |                                                                                                                                                          |                                                                                                                                    |                                                                                                                                                                                              |                                                                                                                                                                                                                |                                                                                                                                                                                                                                                  |                                                                                                                                                                                               |
|-----------------------------------------|-----------------------|----------------------------------------------------------------------------------------------------------------------------------------------------------|------------------------------------------------------------------------------------------------------------------------------------|----------------------------------------------------------------------------------------------------------------------------------------------------------------------------------------------|----------------------------------------------------------------------------------------------------------------------------------------------------------------------------------------------------------------|--------------------------------------------------------------------------------------------------------------------------------------------------------------------------------------------------------------------------------------------------|-----------------------------------------------------------------------------------------------------------------------------------------------------------------------------------------------|
| Parent initiated → Pediatrician delayed | Ben, 4 yrs 9 mos      | ~ <b>12 mos</b> : Parents notice Ben only speaks “gibberish” and does not respond to peers                                                               | At <b>12 mos</b> well-child visit: Parents raise concerns with pediatrician about Ben’s speech.                                    | Pediatrician recommends taking child to Mexico to talk with other children/family. Pediatrician refers to a county agency rather than a specialist, even though they have private insurance. | Parents see new pediatrician, raise speech concerns. New pediatrician refers for hearing eval. After Ben gets ear tubes, new pediatrician’s nurse practitioner revisits speech, refers to RC.                  | <b>20 mos</b> : assessed by the RC (dx: speech delay).<br><b>2 yrs 3 mos</b> : assessed by the RC; dx ASD.<br>~ <b>3 yrs</b> : assessed by the school district (qualifies: “autism” category).                                                   | <b>Conventional:</b><br>Behavior therapy<br>Speech therapy<br>Adapted physical education                                                                                                      |
|                                         | Salvador, 8 yrs 2 mos | ~ <b>2 yrs</b> : Mom notices Salvador lines up his toys, has limited vocabulary, and does not like playing with other children.                          | ~ <b>2.5 yrs</b> : Mom asks pediatrician to test for speech delay.                                                                 | Pediatrician says, “He has eye contact and responds to his name. Maybe next year we can have him tested if it still doesn’t develop.”                                                        | <b>2 yrs 8 mos – 2 yrs 10 mos</b> : Mom keeps raising concerns with pediatrician and asks him to check Salvador's mouth because his articulation was unclear. Pediatrician recommends calling school district. | <b>2 yrs 10 mos</b> : assessed by the school district (qualifies: “autism” category).<br><b>4 yrs 1 mo</b> : Family moves, assessed by new school district (qualifies: “autism” category).<br>~ <b>4 yrs 2 mos</b> : assessed by the RC; dx ASD. | <b>Conventional:</b><br>Behavior therapy<br>Speech therapy<br>Occupational therapy<br>Physical therapy<br>Adapted physical education<br><b>CHA:</b><br>Special diet                           |
|                                         | Mikey, 6 yrs 6 mos    | ~ <b>12 mos</b> : Mom notices Mikey plays with wheels unusually, flaps his hands, and doesn’t want to be picked up.                                      | At <b>18 mos</b> well-child visit: Parents raise concerns with pediatrician about Mikey’s development, insist on speech evaluation | Pediatrician says Mikey is “just being lazy” and they will revisit it at the next visit.                                                                                                     | Pediatrician gets angry (“shouting match”) but makes the referral. MCO speech therapist refers to a psychologist, who refers to a specialist, who refers to the RC.                                            | <b>19 mos</b> : assessed by MCO (dx: speech delay).<br>~ <b>2 yrs</b> : assessed by the RC; dx: DD.<br><b>3 yrs</b> : assessed by the RC; dx ASD.<br>~ <b>4 yrs 10 mos</b> : assessed by school district (qualifies: “autism” category).         | <b>Conventional:</b><br>Behavior therapy<br>Speech therapy<br><b>CHA:</b><br>DAN! Doctor Supplements, vitamins<br>Special diet                                                                |
|                                         | Jayden, 5 yrs 5 mos   | ~ <b>3 mos</b> : Mom notices Jayden does not smile or make eye contact.<br>~ <b>12 mos</b> : Mom notices Jayden is toe walking and has lost a few words. | At <b>12 mos</b> well-child visit: Parents raise concerns about Jayden’s development.                                              | Pediatrician says, “Let’s wait and see.”                                                                                                                                                     | At <b>18 mos</b> visit: Parents raise concerns again. Pediatrician recommends a therapy clinic. A neighbor tells the parents about the RC., Mom calls the RC as it is less expensive.                          | <b>22 mos</b> : assessed by the RC; dx: DD.<br><b>2 yrs 7 mos</b> : assessed by the RC; dx ASD.<br><b>2 yrs 9 mos</b> : assessed by the school district (qualifies: “autism” category).                                                          | <b>Conventional:</b><br>Early intervention<br>Behavior therapy<br>Speech therapy<br>Occupational therapy<br><b>CHA:</b><br>Supplements, vitamins, probiotics, enzymes, omegas<br>Special diet |

|                                                  |                       |                                                                                                                                            |                                                                                                                   |                                                                                                                        |                                                                                                                                 |                                                                                                                                                                                                                          |                                                                                                                                    |
|--------------------------------------------------|-----------------------|--------------------------------------------------------------------------------------------------------------------------------------------|-------------------------------------------------------------------------------------------------------------------|------------------------------------------------------------------------------------------------------------------------|---------------------------------------------------------------------------------------------------------------------------------|--------------------------------------------------------------------------------------------------------------------------------------------------------------------------------------------------------------------------|------------------------------------------------------------------------------------------------------------------------------------|
| Other provider initiated →<br>Parent facilitated | Luke, 5 yrs 6 mos     | ~ <b>18 mos</b> : Mom notices Luke lost previous language (15-20 words) and is not walking.                                                | At ~ <b>2 mos</b> pediatrician visit: Pediatrician tells Mom Luke will have delays because he was born premature. | No pediatrician follow-up on development. (~ <b>18 mos</b> : Luke’s occupational therapist talks to Mom about autism.) | Mom “picks up on the hints” from the occupational therapist and contacts the RC.                                                | ~ <b>2 yrs</b> : Luke is assessed by the RC (dx: ASD & DD).<br><b>2 yrs 10 mos</b> : Luke is assessed by the school district (qualifies: “autism” category).                                                             | <b>Conventional:</b><br>Behavior therapy<br>Speech therapy<br>Occupational therapy<br>Adapted physical education                   |
|                                                  | Gabriela, 3 yrs 4 mos | ~ <b>12-18 mos</b> : Mom notices Gabriela does not talk like her older daughter did at that age and struggles with transitions at daycare. | N/A (Mom does not raise her concerns with the pediatrician).                                                      | N/A (~ <b>22-23 mos</b> : Daycare teacher raises her concerns with Mom and refers her to the RC.)                      | Mom delays going to the RC because the family moves out of state and then back. She later contacts the RC.                      | <b>3 yrs 1 mo</b> : Gabriela is assessed by the RC ; dx ASD.<br><b>3 yrs 11 mos</b> : Gabriela is assessed by the school district (qualifies: “autism” category).                                                        | <b>Conventional:</b><br>Behavior therapy<br>Speech therapy<br>Occupational therapy                                                 |
| Parent initiated →<br>Parent facilitated         | Isabella, 3 yrs 9 mos | ~ <b>12 mos</b> : Mom notices Isabella is not talking; however, she meets other milestones                                                 | N/A (Mom does not raise her concerns with the pediatrician).                                                      | At <b>12 mos</b> visit: Pediatrician does not ask about speech.                                                        | ~ <b>12 mos</b> : Mom “self-refers” to the RC (she knew about the RC because her son, Mateo Jr., was receiving services there). | ~ <b>13 mos</b> : Isabella is assessed by the RC; dx: DD.<br><b>2 yrs 11 mos</b> : Isabella is assessed by the RC; dx ASD.<br><b>3 yrs</b> : Isabella is assessed by the school district (qualifies: “autism” category). | <b>Conventional:</b><br>Early intervention<br>Speech therapy<br>Occupational therapy<br>Respite care<br><b>CHA:</b><br>Supplements |

<sup>1</sup>Pseudonyms
